# Supplementary material for: Laser-assisted exfoliation of Ti3C2Tx
Source: Royal Society of Chemistry journal article supplement (doi:10.1039/d4cp02023e), 2024-01-01

## Supplementary Information

### Laser Assisted Exfoliation of MXenes

*Haoze Jiang<sup>1</sup>, Haonan Zhang<sup>1</sup>, Wuning Wei<sup>1</sup>, Mingshun Qi<sup>1</sup>, Yongpeng Wu<sup>1</sup> and Chenghao Deng<sup>1</sup>\**

1. Center on Nanoenergy Research, Guangxi Colleges and Universities Key Laboratory of Blue Energy and Systems Integration, Carbon Peak and Neutrality Science and Technology Development Institute, School of Physical Science & Technology, Guangxi University, Nanning 530004, China

---

\* Corresponding Author. Email: [cdeng@gxu.edu.cn](mailto:cdeng@gxu.edu.cn)

**Fig. S1.** Tyndall effect of 0.5 mg/ml supernatant of the colloid solution prepared by (a) 30 min US and (b) 30 min LA.

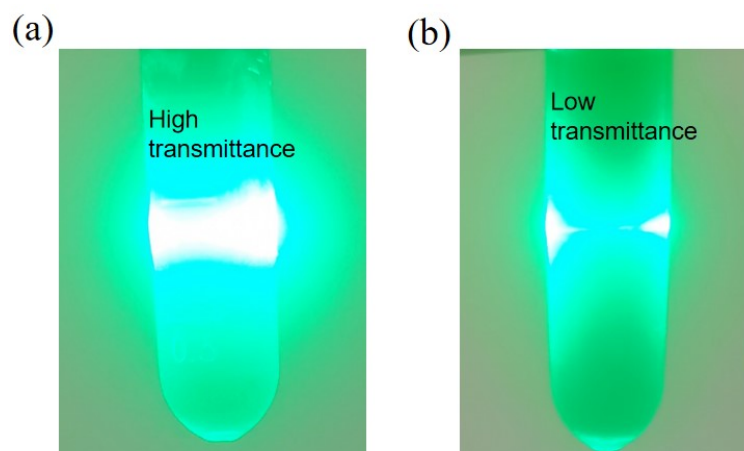

**Fig. S2.** SEM images of (a, d) unetched  $\text{Ti}_3\text{AlC}_2$  particles, (b, e) etched but unexfoliated  $\text{Ti}_3\text{C}_2\text{T}_x$  nanoflakes, (c) US exfoliated and LA exfoliated  $\text{Ti}_3\text{C}_2\text{T}_x$  nanoflakes.

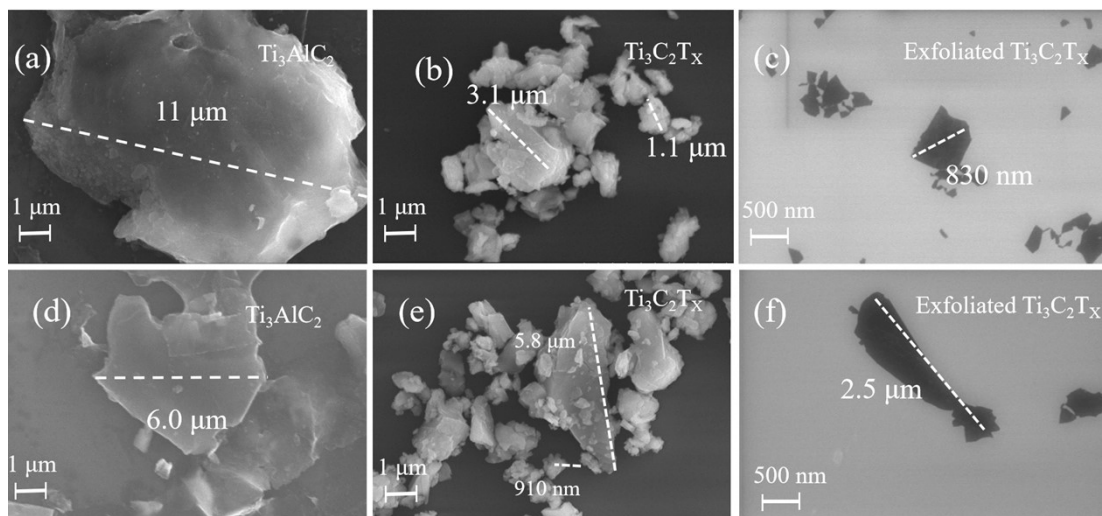

**Fig. S3.** SEM images of  $\text{Ti}_3\text{C}_2\text{T}_x$  nanoflakes exfoliated by (a, b) US and (c, d) LA.

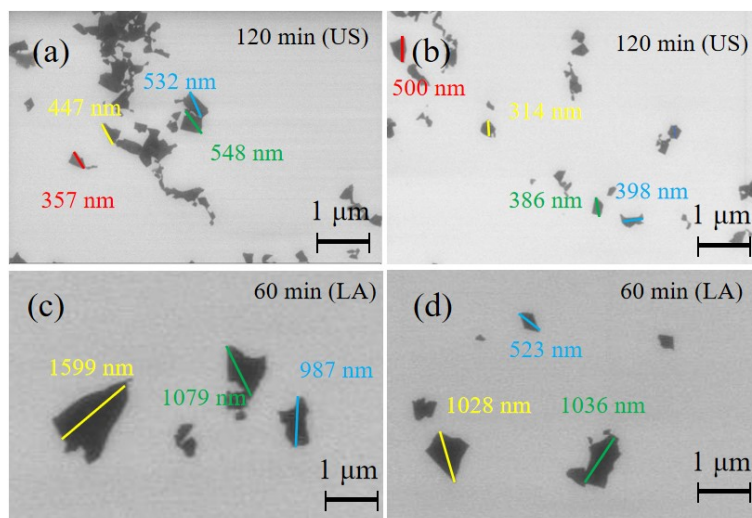

**Fig. S4.** (a-d) Size distribution of the US  $\text{Ti}_3\text{C}_2\text{T}_x$  nanoflakes prepared for 30-120 min. (e-h) Size distribution of the LA  $\text{Ti}_3\text{C}_2\text{T}_x$  nanoflakes prepared for 30-120 min.

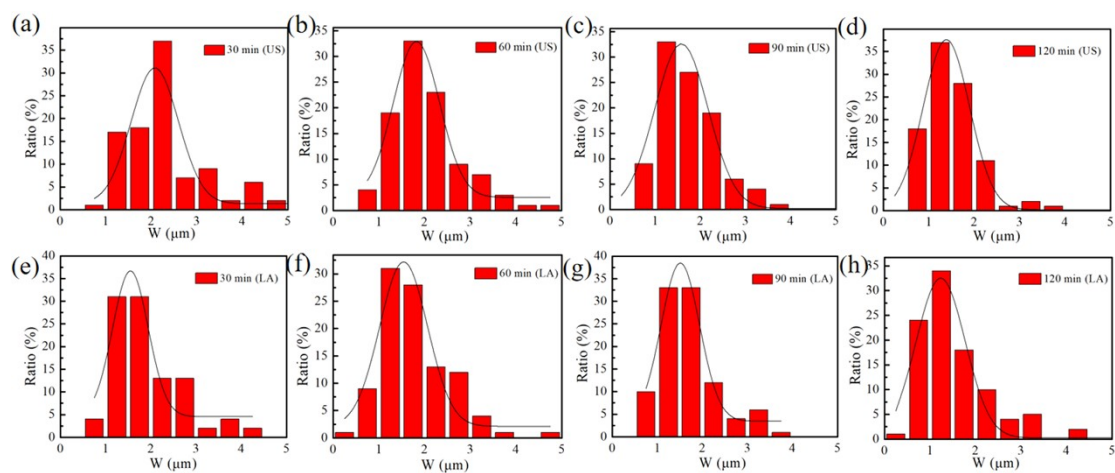

**Fig. S5.** (a-d) Thickness distribution of the US  $\text{Ti}_3\text{C}_2\text{T}_x$  nanoflakes prepared for 30-120 min. (e-h) Thickness distribution of the LA  $\text{Ti}_3\text{C}_2\text{T}_x$  nanoflakes prepared for 30-120 min.

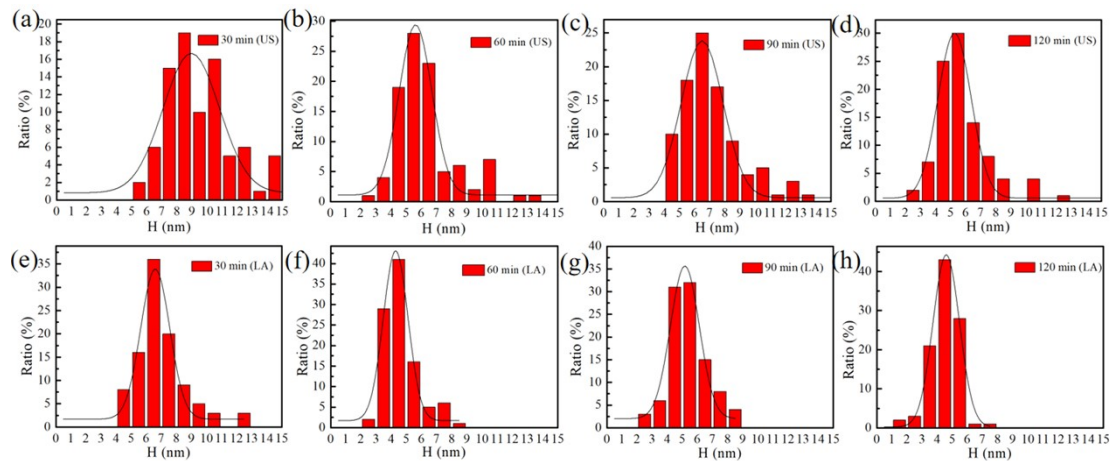

**Fig. S6.** (a) The relative error ( $\Delta W/W$ ) of the  $\text{Ti}_3\text{C}_2\text{T}_x$  size. (b) The relative error ( $\Delta H/H$ ) of the  $\text{Ti}_3\text{C}_2\text{T}_x$  thickness .

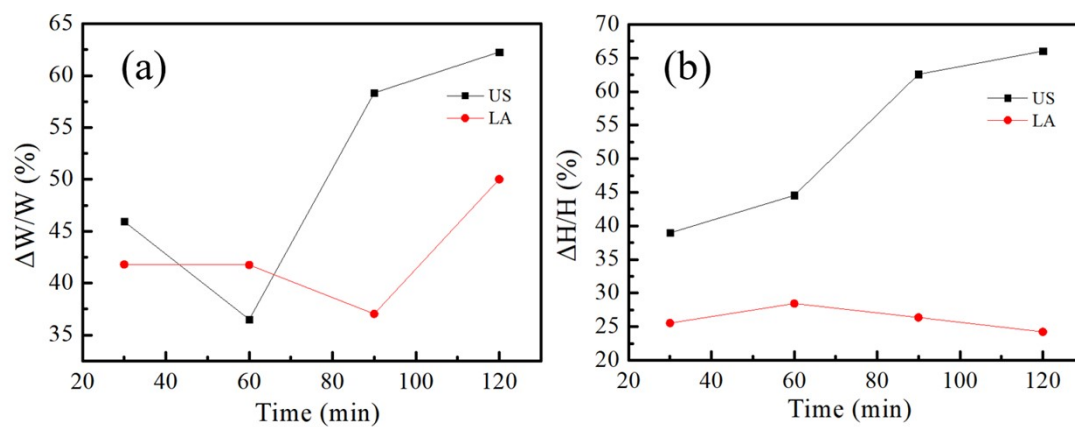

**Fig. S7.** Fine XPS spectrum of Ti 2p for  $\text{Ti}_3\text{C}_2\text{T}_x$  prepared by (a) 60 min US, (b) 60 min LA and (c) 120 min US. Fine XPS spectrum of O 1s for  $\text{Ti}_3\text{C}_2\text{T}_x$  prepared by (d) 60 min US, (e) 60 min LA and (f) 120 min US.

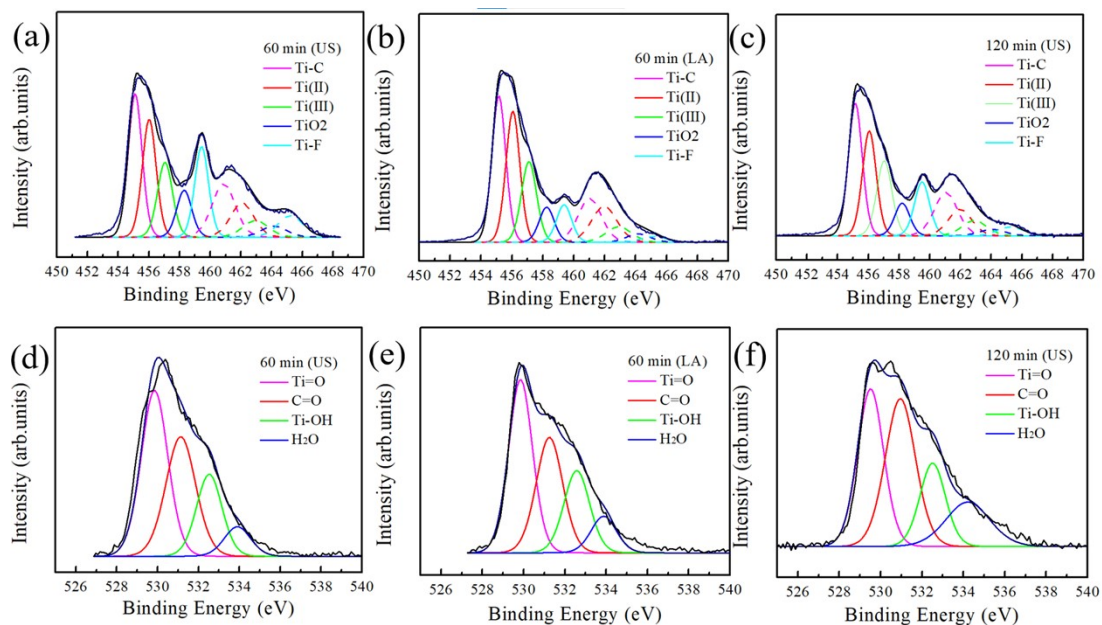

Supplement: d4cp02023e1.pdf [file d4cp02023e1.pdf]
